# Supplementary material for: Tuning the photodriven electron transport within the columnar perylenediimide stacks by changing the π-extent of the electron donors
Source: Royal Society of Chemistry journal article supplement (doi:10.1039/c2cp44106c), 2013-01-01
Supplement: c2cp44106c.pdf [file c2cp44106c.pdf]

-- **Electronic Supplementary Information** --

**Tuning the photodriven electron transport within the  
columnar perylenediimide stacks by changing the  $\pi$ -  
extent of the electron donors**

Mustafa Supur<sup>a</sup> and Shunichi Fukuzumi<sup>\*,a,b</sup>

<sup>a</sup>Department of Material and Life Science, Graduate School of Engineering, Osaka University, ALCA, Japan Science and Technology Agency (JST), Suita, Osaka 565-0871, Japan

<sup>b</sup>Department of Bioinspired Science, Ewha Womans University, Seoul 120-750, Korea

*Phys.Chem.Chem.Phys.* **CP-ART-11-2012-044106**

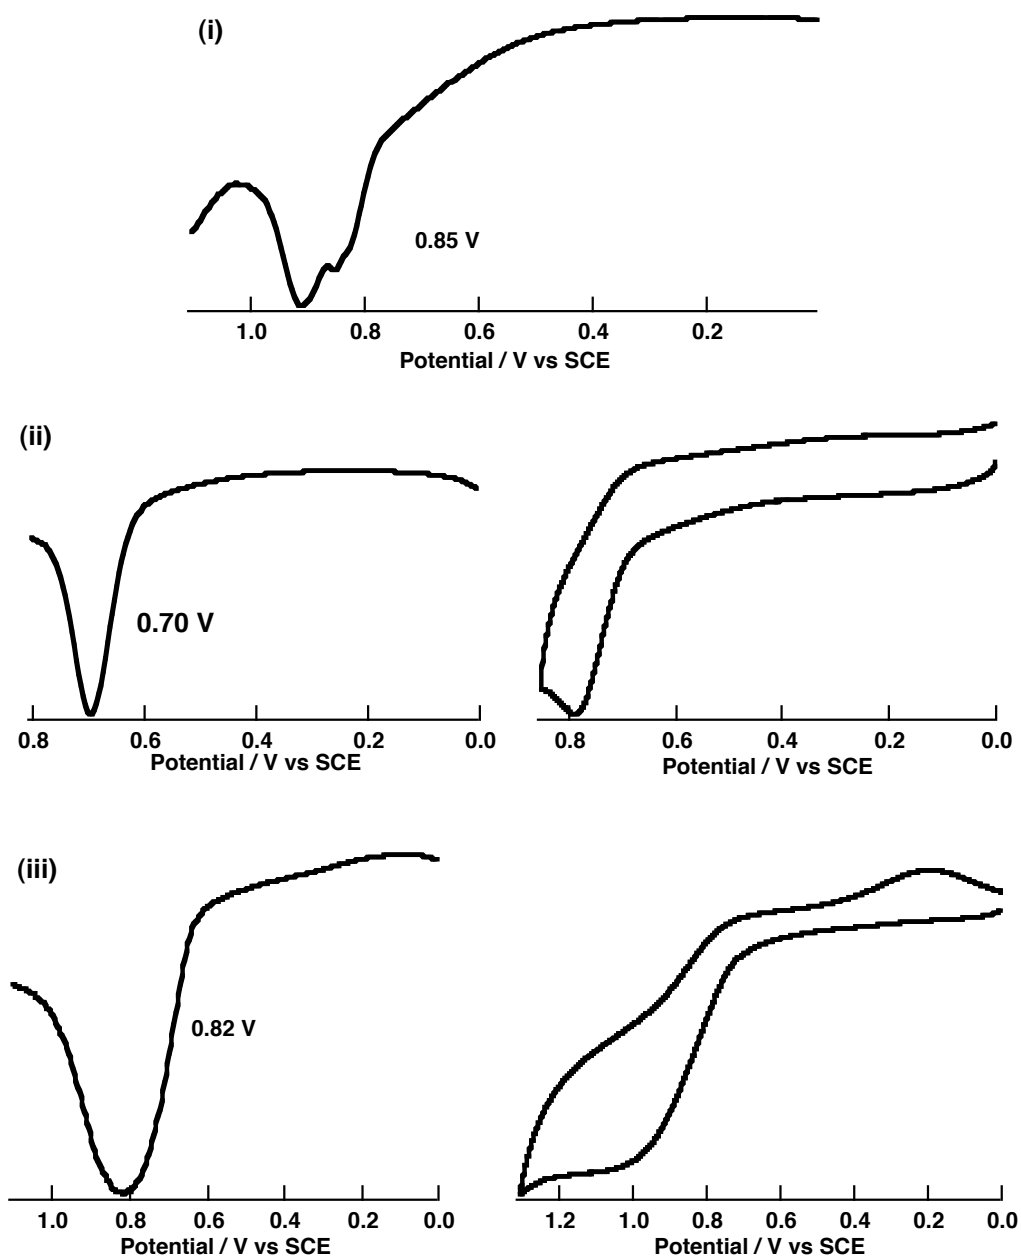

**Fig. S1** (i) Differential pulse voltammogram of BSSBP, (ii) differential pulse and cyclic voltammograms of DANS, and (iii) differential pulse and cyclic voltammograms of ANADS in deaerated water containing 0.10 M Na<sub>2</sub>SO<sub>4</sub> (sweep rate: 0.1 mV/s).

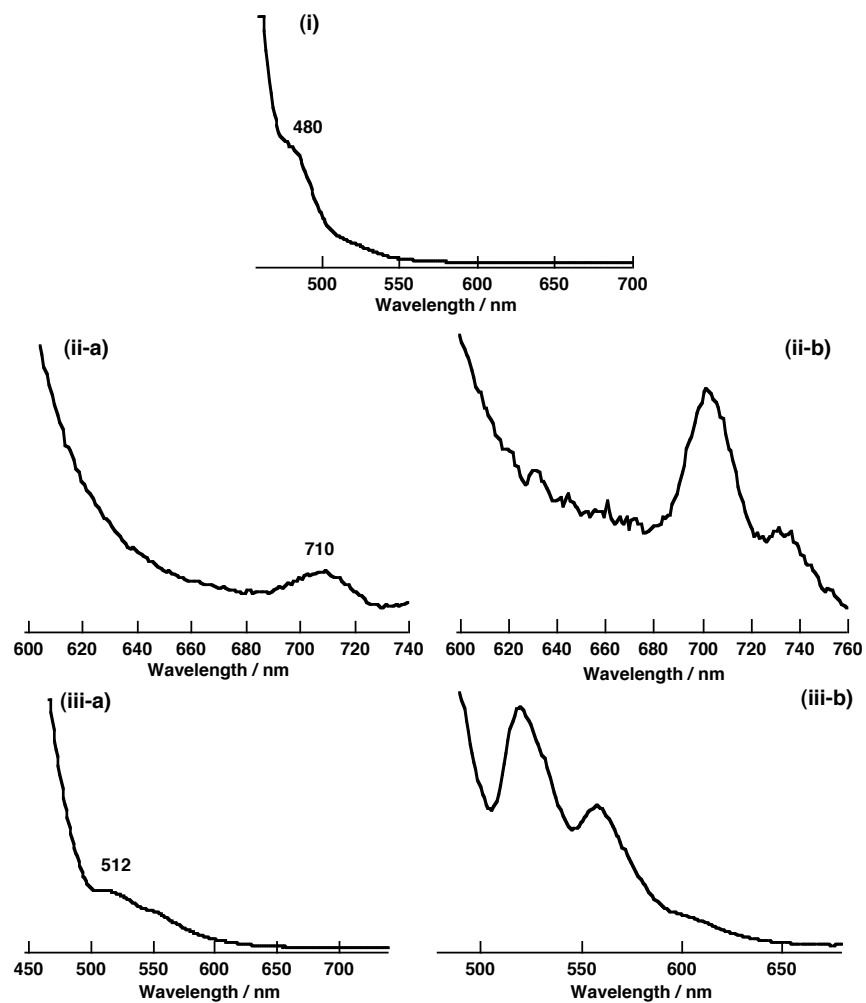

**Fig. S2** Phosphorescence spectra of (i) BSSBP in MeTHF/EtOH, (ii-a) DANS in MeTHF/EtOH, (ii-b) 9,10-dimethylantracene in MeTHF, (iii-a) ANADS in MeTHF/EtOH, and (iii-b) naphthalene-2-amine in MeTHF containing MeI at 77 K.

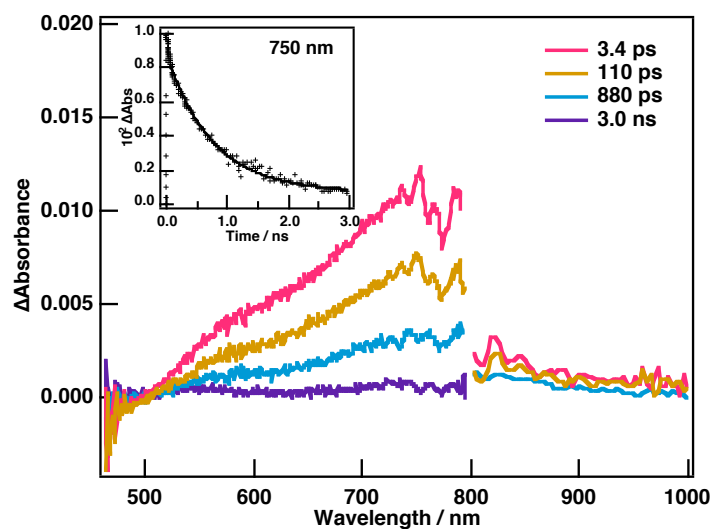

**Fig. S3** Femtosecond transient absorption spectra of BSSBP in water at indicated time delays. Inset: Time profile at 750 nm ( $\lambda_{\text{exc}} = 390$  nm).

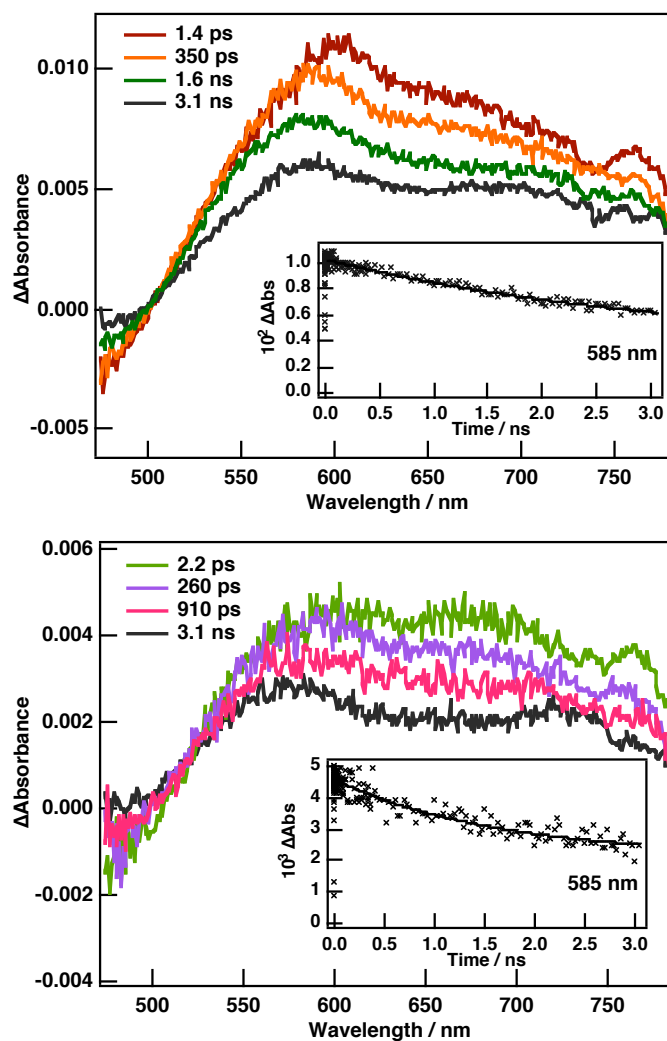

**Fig. S4** Femtosecond transient absorption spectra of ANADS (upper panel) and femtosecond transient absorption spectra of ANADS-(TAIPDI)<sub>n</sub> in deaerated water at indicated time delays (lower panel). Insets: Time profiles at 585 nm ( $\lambda_{\text{exc}} = 390$  nm).

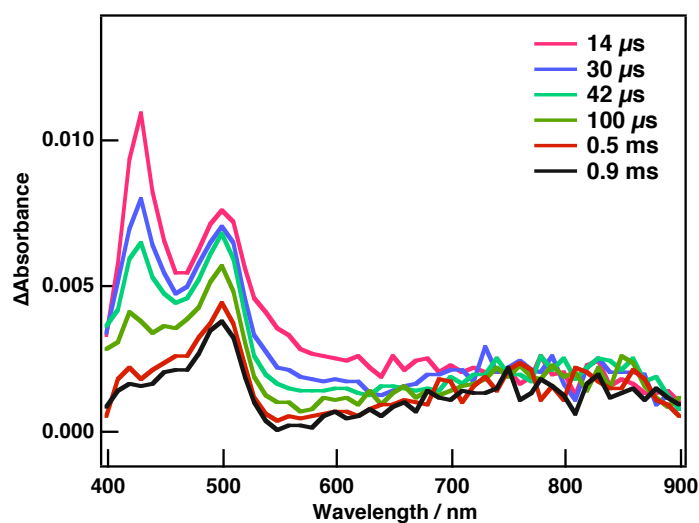

**Fig. S5** Nanosecond transient absorption spectra of DANS in water at indicated time delays ( $\lambda_{\text{exc}} = 355$  nm).

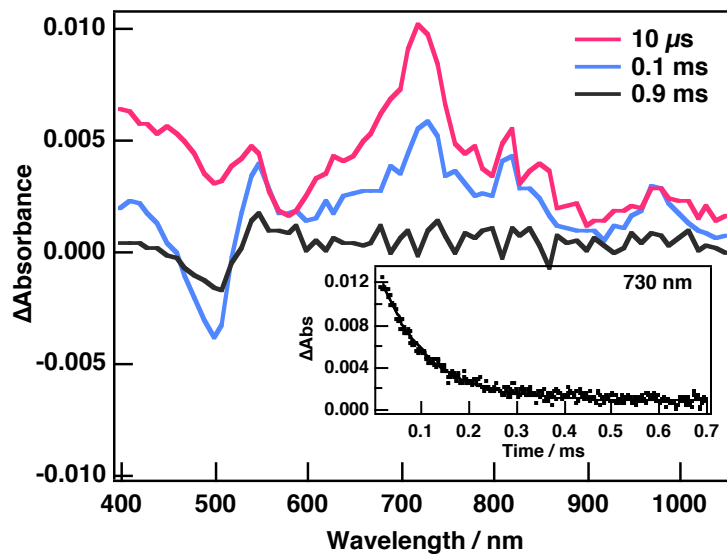

**Fig. S6** Nanosecond transient absorption spectra of ANADS-(TAIPDI)<sub>n</sub> in deaerated water at indicated time delays. Inset: Time profile at 730 nm ( $\lambda_{\text{exc}} = 355$  nm).

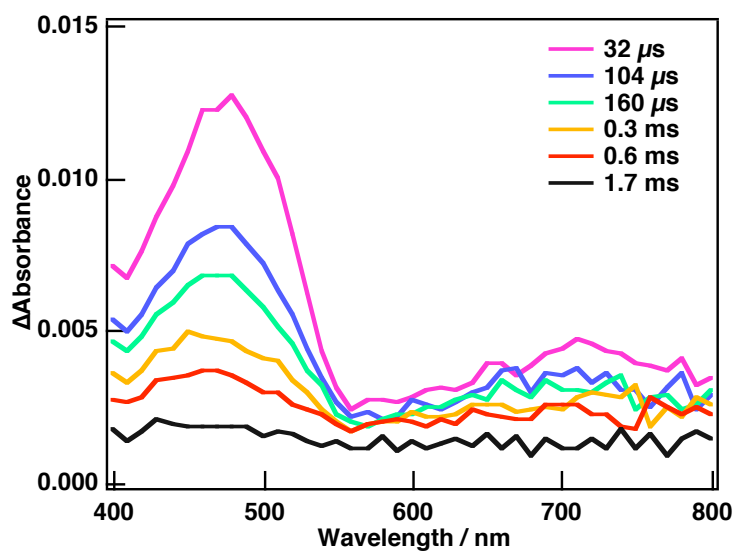

**Fig. S7** Nanosecond transient absorption spectra of ANADS in water at indicated time delays ( $\lambda_{\text{exc}} = 355$  nm).
